# Supplementary material for: The role of intra-articular neuronal CCR2 receptors in knee joint pain associated with experimental osteoarthritis in mice
Source: PubMed Central journal article supplement (PMC8025346; doi:10.1186/s13075-021-02486-y), 2021-04-07
Supplement: 13075_2021_2486_MOESM1_ESM.pdf [file 13075_2021_2486_MOESM1_ESM.pdf]

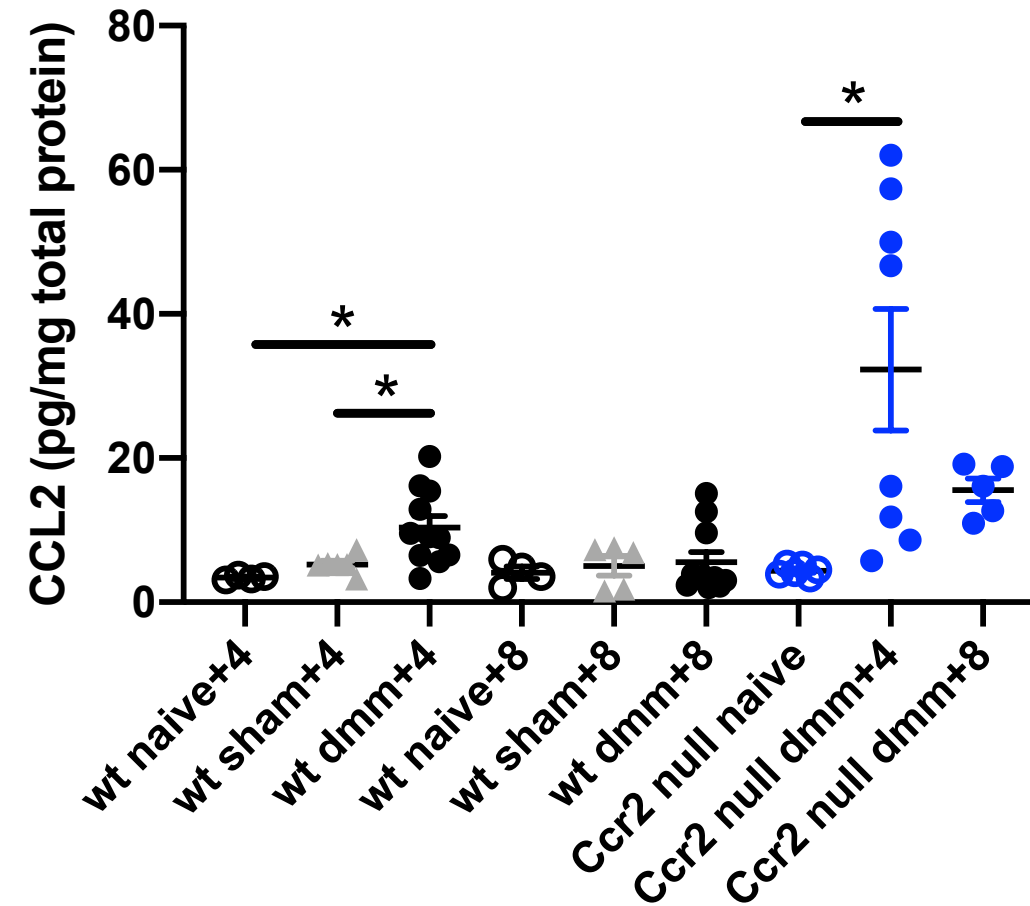

**Supp Fig. 1.** CCL2 protein expression in whole knee joint extracts collected from wild-type (wt) and *Ccr2* null mice at different time points after sham or DMM surgery. (n=4 mice wt naïve 14 weeks old; n=6 wt sham +4; n=11 wt dmm+4; n=4 wt naïve 18 weeks old; n=5 wt sham+8; n=11 wt dmm+8; n=6 *Ccr2* null naïve 10 weeks old; n=8 *Ccr2* null DMM+4; n=5 *Ccr2* null DMM+8) \*p<0.05, \*\*p<0.01 vs vehicle. One-way ANOVA with Tukey's multiple comparisons test to compare treatment groups at each time point. Mean±SEM.

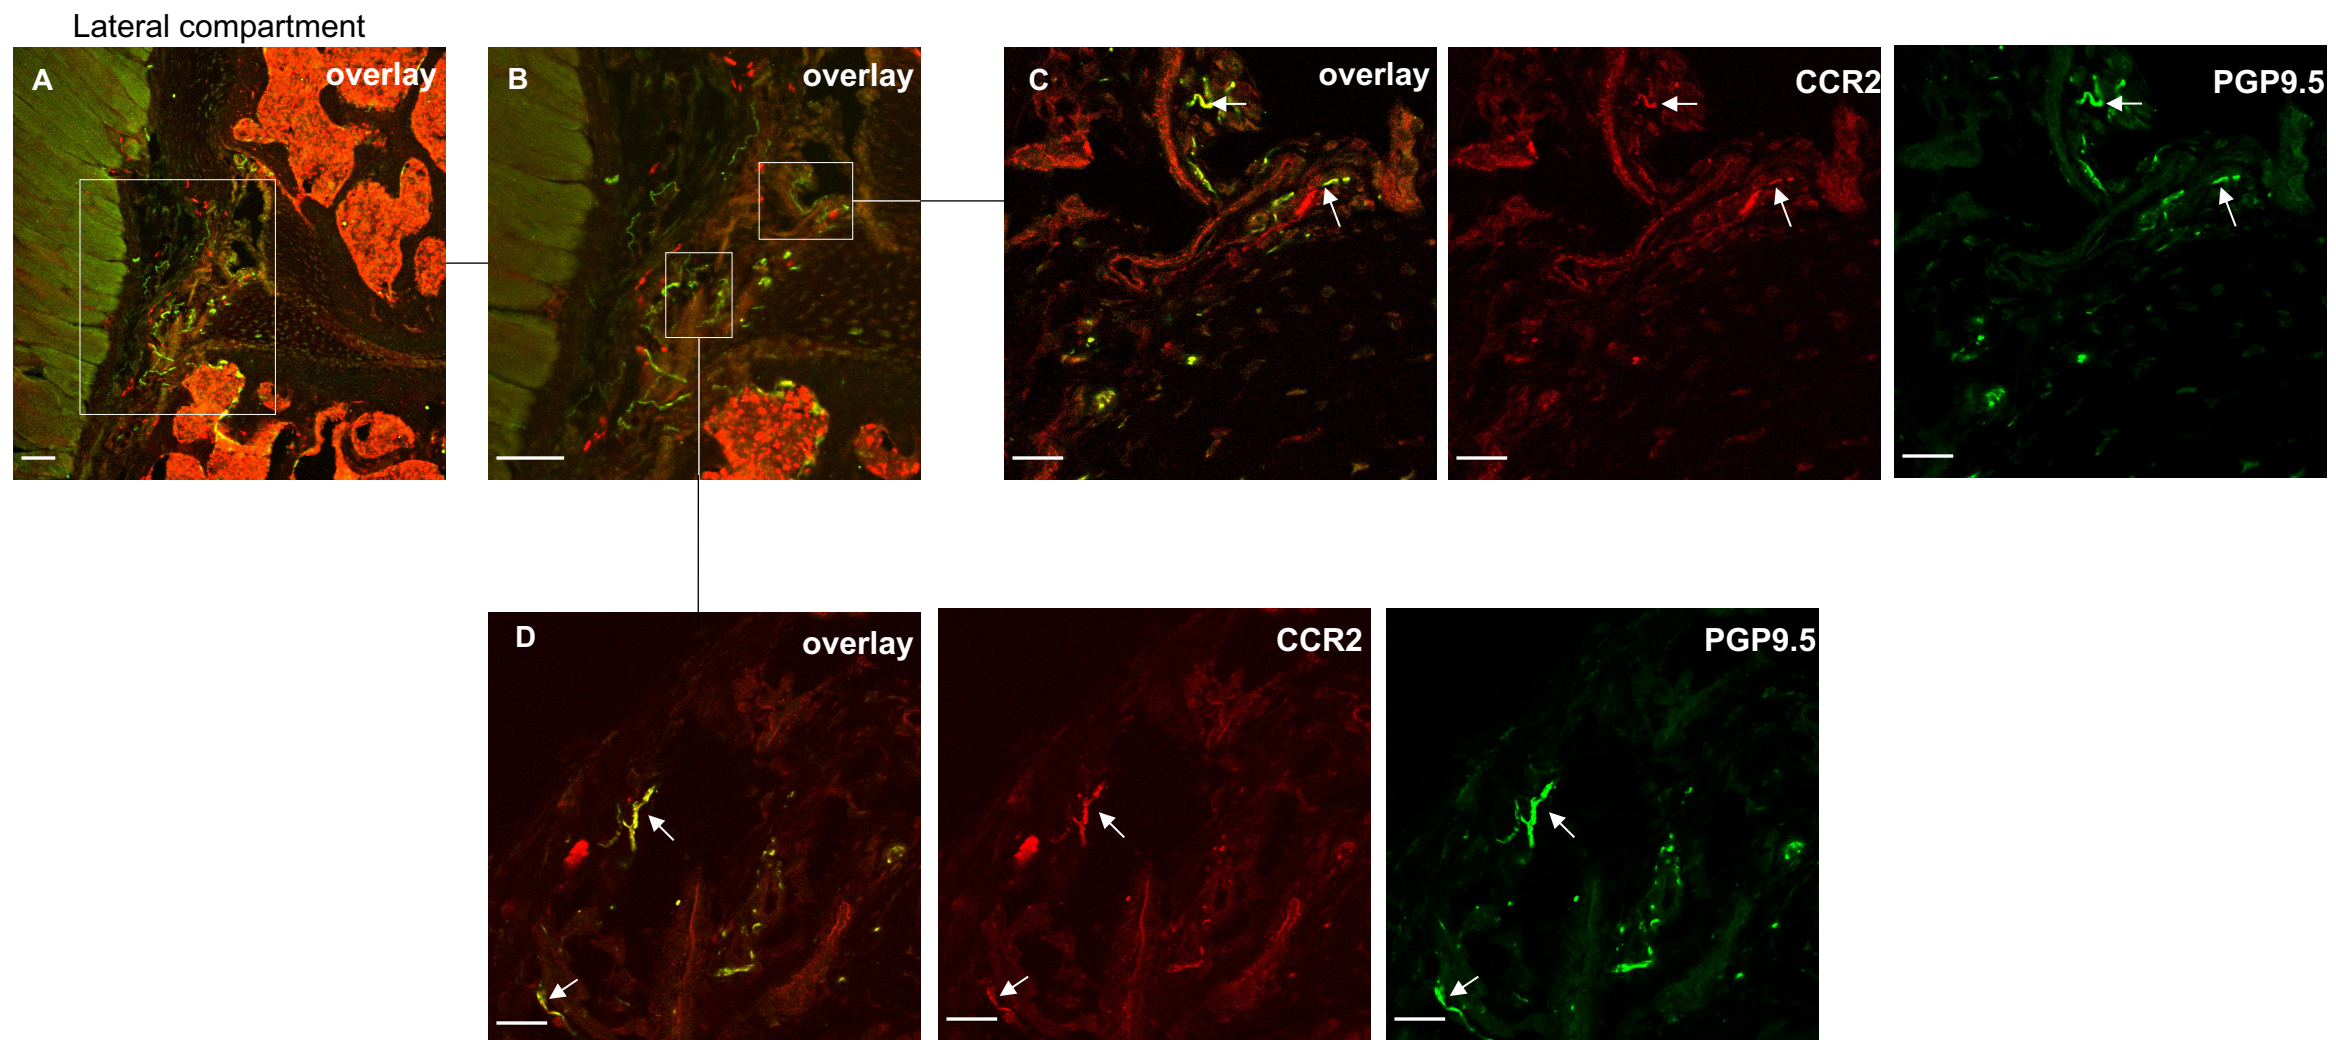

**Supp. Fig. 2:** Representative confocal images of the right knee of a 10-week old male naïve *Ccr2*<sup>RFP</sup> mouse, immunostained with PGP9.5. **(A,B)** Two different magnifications of a representative frontal section demonstrating PGP9.5/CCR2 overlays within the lateral synovium of the knee; **(C,D)** magnified white insets of **(B)** showing CCR2, PGP9.5 signals and the overlays of both images. White arrows indicate the exact areas of the overlap between PGP9.5 and CCR2 signals (CCR2 receptors present on PGP9.5+ nerve fibers). Scale bar for **A,B** = 100  $\mu$ m. Scale bar for the rest of images = 25  $\mu$ m.

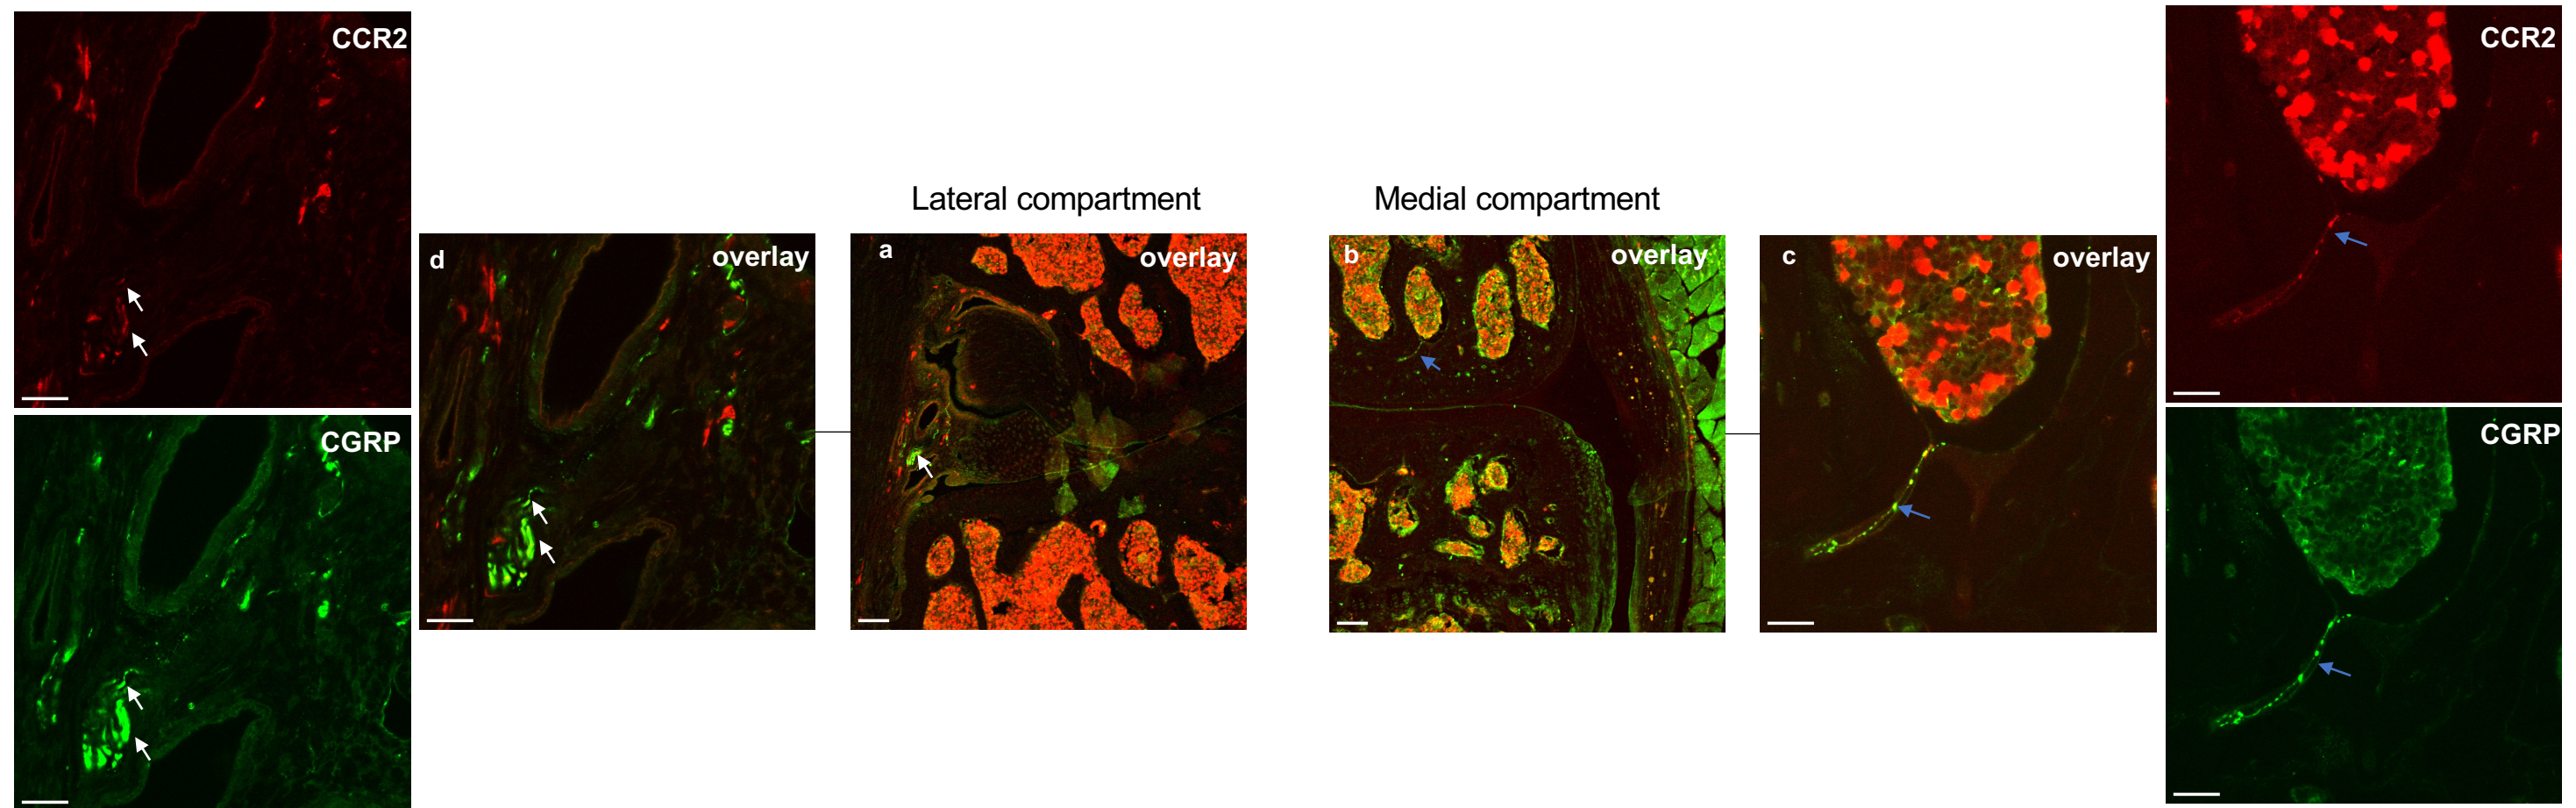

**Suppl Figure 3:** Representative confocal images of the right knee of *Ccr2*<sup>RFP</sup> mouse 8 weeks after DMM surgery from a different mouse than shown in Fig. 7, immunostained with CGRP. (a, b) CGRP/CCR2 overlay of the lateral and medial compartments of the knee respectively; (c) magnified of (b) showing CCR2, CGRP signals and the overlay of both images. Blue arrows point to a CGRP+/CCR2+ channel in the medial subchondral bone. (d) magnified of (a) showing CCR2, CGRP signals and the overlays of both images. White arrows point to CGRP+/CCR2+ signal in the lateral synovium. Scale bar for a,b = 100  $\mu$ m. Scale bar for c,d = 25  $\mu$ m.
